# Supplementary material for: Reliability, validity, and measurement invariance of a Chinese handwriting legibility scale among primary students in central China
Source: Frontiers journal article supplement (doi:10.3389/fpsyg.2023.1050894), 2023-07-28
Supplement: Data_Sheet_1.PDF [file Data_Sheet_1.PDF]

### Supplementary material:

#### Handwriting evaluation in general:

| Name of the instrument                                                | Age        | Scoring method                                                   | Script             | Criteria                                                                                                                                                                                                                                           | Application       |
|-----------------------------------------------------------------------|------------|------------------------------------------------------------------|--------------------|----------------------------------------------------------------------------------------------------------------------------------------------------------------------------------------------------------------------------------------------------|-------------------|
| Chinese Handwriting Evaluation Form (CHEF; Chang & Yu, 2012)          | Grades 1-2 | A 5-point Likert scale (1: never matching to 5: always matching) | Chinese characters | 1. Construction: size, spacing, and alignment of characters and components<br>2. Accuracy: the malformation of characters, i.e., incorrect figuration of components, adding or missing strokes<br>3. Speed<br>4. Pencil grasp<br>5. Directionality | Shin et al., 2018 |
| Chinese Handwriting Evaluation Questionnaire (CHEQ; Chang & Yu, 2005) | Grade 2    | Unspecified                                                      | Chinese characters | 1. Legibility<br>2. Accuracy<br>3. Speed<br>4. Pencil grip<br>5. Gross movement<br>6. Attitude                                                                                                                                                     | Chang & Yu, 2005  |
| The Tseng Handwriting Problem Checklist (THPC; Tseng, 1993)           | Grades 1-4 | A 4-point scale, ranging from 1 = always to 4 = seldom           | Chinese characters | 1. Construction<br>2. Accuracy<br>[1&2 reflect measures of legibility]<br>3. Behavior<br>4. Sequencing<br>5. Motor<br>6. Directionality                                                                                                            | Shen et al., 2012 |

|                                                                               |                    |                                                                           |          |                                                                                                                                                                                                                                                                                                                                                                                                                                                                                                                                                                                                    |                      |
|-------------------------------------------------------------------------------|--------------------|---------------------------------------------------------------------------|----------|----------------------------------------------------------------------------------------------------------------------------------------------------------------------------------------------------------------------------------------------------------------------------------------------------------------------------------------------------------------------------------------------------------------------------------------------------------------------------------------------------------------------------------------------------------------------------------------------------|----------------------|
| The Handwriting Legibility Scale (HLS; Barnett et al., 2013, 2018)            | Children aged 8-14 | A scale from 1-5, with 1 representing the best performance                | Alphabet | <ol style="list-style-type: none"> <li>1. Global legibility (overall readability of the text on first reading)</li> <li>2. Layout on the page</li> <li>3. Letter formation</li> <li>4. Effort to read the script</li> <li>5. Alterations to writing (attempts made to rectify written work)</li> </ol>                                                                                                                                                                                                                                                                                             | Prunty et al., 2016  |
| The Handwriting Proficiency Screening Questionnaire (HPSQ; Rosenblum, 2008)   | Grades 2-8         | A 5-point scale (0 refers to never and 4 refers to always)                | Alphabet | <ol style="list-style-type: none"> <li>1. Unreadable handwriting</li> <li>2. Unsuccessful in reading his/her own handwriting</li> <li>3. A lack of time to copy</li> <li>4. Often erases</li> <li>5. Does not want to write</li> <li>6. Does not do homework</li> <li>7. Complains about pain</li> <li>8. Tired while writing</li> <li>9. Needs to look often when copying</li> <li>10. Not satisfied with his/her handwriting</li> </ol> <p>Among them, items 3 through 9 represents the factor of 'performance time and well-being', whereas items 1, 2, and 10 denotes 'legibility' factor.</p> | Rosenblum, 2008      |
| Detailed Assessment of Speed of Handwriting (DASH test; Barnett et al., 2007) | Aged 9-16          | To calculate the writing speed, the total of legible words divided by the | Alphabet | The quality and speed of writing under different conditions including copying and generating text.                                                                                                                                                                                                                                                                                                                                                                                                                                                                                                 | Barnett et al., 2007 |

|  |  |                                                                                                                                                                                                               |  |  |  |
|--|--|---------------------------------------------------------------------------------------------------------------------------------------------------------------------------------------------------------------|--|--|--|
|  |  | <p>time of the test is counted.</p> <p>The legible letters are counted and in the correct sequence.</p> <p>In task “graphic speed”, the speed is counted by the correct number of “X” inside the circles.</p> |  |  |  |
|--|--|---------------------------------------------------------------------------------------------------------------------------------------------------------------------------------------------------------------|--|--|--|

**Computerized handwriting evaluation:**

| Name of the instrument                                                      | Age        | Scoring method                   | Script             | Criteria                                                                                                                                                                                                                                                                      | Application                              |
|-----------------------------------------------------------------------------|------------|----------------------------------|--------------------|-------------------------------------------------------------------------------------------------------------------------------------------------------------------------------------------------------------------------------------------------------------------------------|------------------------------------------|
| The Chinese Handwriting Assessment Tool (CHAT; Li-Tsang et al., 2011, 2013) | Grades 1-6 | Computerized real-time recording | Chinese characters | 1. Accuracy: no. of correctly written characters/90 characters<br>2. Speed: no. of characters copied per min, pause time to on-paper time ratio<br>3. Pressure: mean pen pressure and variability<br>4. No. of characters exceeded grid<br>5. Average size of characters (mm) | Cheng-Lai et al., 2013; Lam et al., 2011 |

|                                                                                        |            |                                  |                    |                                                                                                                                                                                                                                                                                                                                                                            |                       |
|----------------------------------------------------------------------------------------|------------|----------------------------------|--------------------|----------------------------------------------------------------------------------------------------------------------------------------------------------------------------------------------------------------------------------------------------------------------------------------------------------------------------------------------------------------------------|-----------------------|
|                                                                                        |            |                                  |                    | 6. Variability (SD) of character size (mm)                                                                                                                                                                                                                                                                                                                                 |                       |
| The Smart Handwriting Analysis and Recognition Platform (SHARP; Li-Tsang et al., 2022) | Grades 1-6 | Computerized real-time recording | Chinese characters | 1. Handwriting process (ground time, air time, air/ground time ratio, speed, SD of writing time per character, pen pressure, SD of pressure);<br>2. Handwriting product (out of grid, size, SD of size, identified words, wrong stroke, additional stroke, missing stroke, concatenated stroke, reverse stroke, wrong stroke sequence)                                     | Li-Tsang et al., 2022 |
| The Computerized Legibility Assessment (CLA; Lee et al., 2016)                         | Grades 1-6 | Computerized real-time recording | Chinese characters | 1. Length of every stroke<br>2. Orientation of every stroke<br>3. Placement of every stroke<br>4. Task completion time<br>5. Stroke velocity<br>6. Stroke force<br>7. Pause time per stroke                                                                                                                                                                                | Lee et al., 2016      |
| Computerized apparatus and handwriting task (Shen et al., 2012)                        | Grades 1-4 | Computerized real-time recording | Chinese characters | The positions, sequence of strokes, and pressure of writing:<br>1. Total writing time<br>2. Total in-air time<br>3. Total on-paper time, which is the length of time the pen touches paper<br>4. In-air trajectory<br>5. Speed (cm/s): the length of distance when pen touches paper<br>6. Axial pen pressure<br>7. Average character width<br>8. Average character height | Shen et al., 2012     |

|                                                                            |                           |                                        |                            |                                                                                                                                                                                                                                                                                                                          |                         |
|----------------------------------------------------------------------------|---------------------------|----------------------------------------|----------------------------|--------------------------------------------------------------------------------------------------------------------------------------------------------------------------------------------------------------------------------------------------------------------------------------------------------------------------|-------------------------|
| Name Writing Task<br>(Taverna et al., 2020)                                | Grade 1                   | Computerized<br>real-time<br>recording | Alphabet                   | 1. Speed/Frequency of strokes: frequency of upward and downward movements in 1 s<br>2. Stroke pressure<br>3. Automaticity: no. of inversion of velocity                                                                                                                                                                  | Taverna et al., 2020    |
| Handwriting Tasks<br>(Wicki et al., 2014)                                  | Grade 4                   | Computerized<br>real-time<br>recording | (Swiss-German)<br>Alphabet | 1. Speed/Stroke frequency: no. of upward and downward movements in 1 s<br>2. Stroke pressure<br>3. Automaticity: no. of inversion of velocity                                                                                                                                                                            | Wicki et al., 2014      |
| The Computerized Penmanship Evaluation Tool (POET; Rosenblum et al., 2003) | Children aged 8-9         | Computerized<br>real-time<br>recording | Alphabet                   | 1. Spatial measure: the total path length on the paper of all the characters written in the paragraph<br>2. Temporal measure: the time taken to write each segment, the total time taken to complete the entire paragraph, on-paper time, and in-air time<br>3. Pressure measure: the mean pressure applied to the paper | Mekyska et al., 2017    |
| A digital diagnostic tool<br>(Pagliarini et al., 2017)                     | Grade 1-5                 | Computerized<br>real-time<br>recording | Alphabet                   | Kinematics and trajectory of handwriting                                                                                                                                                                                                                                                                                 | Pagliarini et al., 2017 |
| A digital diagnostic tool<br>(Mekyska et al., 2017)                        | Grade 3<br>(aged 8 and 9) | Computerized<br>real-time<br>recording | Alphabet                   | 1. Kinematic Measures (speed, velocity, acceleration, jerk, normalized jerk, height, orientation, duration, and length)<br>2. Nonlinear dynamic features<br>3. Other Features                                                                                                                                            | Mekyska et al., 2017    |
| A digital diagnostic tool<br>(Asselborn et al., 2018)                      | Children                  | Computerized<br>real-time<br>recording | Alphabet<br>(Latin)        | 1. The geometrical aspect of handwriting,<br>2. The use of pressure, tilt, and kinematics.                                                                                                                                                                                                                               | Asselborn et al., 2018  |

|                                                    |          |                                        |          |                                                                                                                                                                                                                                                                                                                                                                                                                                                                                                                                                                                                                                                                                                                                                               |                     |
|----------------------------------------------------|----------|----------------------------------------|----------|---------------------------------------------------------------------------------------------------------------------------------------------------------------------------------------------------------------------------------------------------------------------------------------------------------------------------------------------------------------------------------------------------------------------------------------------------------------------------------------------------------------------------------------------------------------------------------------------------------------------------------------------------------------------------------------------------------------------------------------------------------------|---------------------|
| A digital diagnostic tool<br>(Gargot et al., 2020) | Children | Computerized<br>real-time<br>recording | Alphabet | 1. Static characteristics (purely geometrical characteristics of the handwriting text: space between words, SD of handwriting density, and median of power spectral of tremor frequencies);<br>2. Kinematic features (dynamics of the handwriting process: median of power spectral of speed frequencies, distance to mean of speed frequencies, in-air-time ratio);<br>3. Pressure features (pressure measured between the pen tip and the tablet surface: average pressure, mean speed of pressure change, SD of speed of pressure change);<br>4. Tilt features (tilt between the pen and the surface of the tablet: distance to mean of tilt-x frequencies, the bandwidth of speed of tilt-x frequencies, median of power spectral of tilt-y frequencies). | Gargot et al., 2020 |
|----------------------------------------------------|----------|----------------------------------------|----------|---------------------------------------------------------------------------------------------------------------------------------------------------------------------------------------------------------------------------------------------------------------------------------------------------------------------------------------------------------------------------------------------------------------------------------------------------------------------------------------------------------------------------------------------------------------------------------------------------------------------------------------------------------------------------------------------------------------------------------------------------------------|---------------------|

#### Handwriting legibility evaluation:

| Name of the instrument                                              | Age           | Scoring method                                       | Script           | Criteria                                                             | Application                                        |
|---------------------------------------------------------------------|---------------|------------------------------------------------------|------------------|----------------------------------------------------------------------|----------------------------------------------------|
| Scale (authors)                                                     | Adaptive ages | Rating method                                        | Script type      | Criteria and indicators                                              | Research application                               |
| The Persian Handwriting Assessment Tool (PHAT; Havaei et al., 2017) | Grades 2-3    | A 5-point scale, ranging from very poor to very good | (Tajik) alphabet | 1. Formation<br>2. Space<br>3. Alignment<br>4. Size<br>5. Text slant | Farhangnia et al., 2020; Seyyedrezaei et al., 2021 |

|                                                                                          |                    |                                                                |          |                                                                                                                                                                                                                                                                                                                                                                                                                                                                                                                                                                                                                                                                                                                                                                                                                                                                              |                                          |
|------------------------------------------------------------------------------------------|--------------------|----------------------------------------------------------------|----------|------------------------------------------------------------------------------------------------------------------------------------------------------------------------------------------------------------------------------------------------------------------------------------------------------------------------------------------------------------------------------------------------------------------------------------------------------------------------------------------------------------------------------------------------------------------------------------------------------------------------------------------------------------------------------------------------------------------------------------------------------------------------------------------------------------------------------------------------------------------------------|------------------------------------------|
| The Minnesota Handwriting Assessment (MHA, Reisman, 2004)                                | Children aged 7-12 | One point for each correct letter following specified criteria | Alphabet | 1. Legibility<br>2. Spacing<br>3. Alignment<br>4. Size<br>5. Form                                                                                                                                                                                                                                                                                                                                                                                                                                                                                                                                                                                                                                                                                                                                                                                                            | Bo et al., 2014;<br>Bumin & Kavak, 2010  |
| The Scale of Children's Readiness In PrinTing (SCRIPT; Weil & Cunningham Amundson, 1994) | Kindergarten       | One point for each correct letter following specified criteria | Alphabet | Correct:<br>1. The letter is recognizable and legible.<br>2. All parts of the letter are complete, e.g., i must be dotted; f and t must be crossed; m, u, r, d and similar letters (h, b, p, n) all contain the straight line and not just curves (d looking like a reversed 6 is counted as incorrect); g, q, and/must have curves on descenders and ascenders; n, m, and w need to be proportionate to 1/4 in. of the body of the letter's length.<br>3. The letter is proportionate in size (parts, body).<br>Incorrect:<br>1. The letter is reversed (typically b, d, p, q).<br>2. The letter is rotated more than 45° from proper orientation.<br>3 An uppercase letter is substituted for a lowercase letter or vice versa.<br>4. The letter contains additional parts (e.g., an m contains more than two humps).<br>5. The letter is not printed within the box below | Daly et al., 2003;<br>Desai & Rege, 2004 |

|                                                            |            |                                                                        |                   |                                                                                                                                                                                                                                                                                                                                                                                                                                     |                                                                                                                                                        |
|------------------------------------------------------------|------------|------------------------------------------------------------------------|-------------------|-------------------------------------------------------------------------------------------------------------------------------------------------------------------------------------------------------------------------------------------------------------------------------------------------------------------------------------------------------------------------------------------------------------------------------------|--------------------------------------------------------------------------------------------------------------------------------------------------------|
|                                                            |            |                                                                        |                   | <p>the model letter.</p> <p>6. The letter is in two or more distinct parts. A break in a line of less than 1/16 in. is permitted.</p> <p>7. In the letters a, b, d, m, n, p, q, and r, the straight line extends more than 1/4 in below or above the body of the letter or is not proportionate.</p>                                                                                                                                |                                                                                                                                                        |
| The Hebrew Handwriting Evaluation (HHE; Erez et al., 1996) | Grades 1-4 | A scale from 1-4, with 1 representing the best performance             | Alphabet (Hebrew) | <p>1. Legibility: global legibility, letter formation [e.g., closure, reversals]</p> <p>2. Spatial arrangement/organization [e.g., consistency, spacing--absence of gaps or overlaps of letters/words, letter size, alignment, margins, and straight lines]</p> <p>3. Direction: writing letters in the appropriate direction</p> <p>4. Speed</p> <p>5. Posture [e.g., positioning of the paper and stability of head and neck]</p> | <p>Gilboa et al., 2010, 2014;</p> <p>Parush et al., 2010;</p> <p>Preminger et al., 2004;</p> <p>Rosenblum, 2008;</p> <p>Yochman &amp; Parush, 1998</p> |
| The Handwriting Evaluation Scale (Malloy-Miller, 1985)     | Grade1 1-6 | Percentage of errors versus total number of letters printed or written | Alphabet          | <p>1. Spacing within words (overlapping letters or letters too far apart)</p> <p>2. Spacing between words (too little, too much or no space between words)</p> <p>3. Size of letters within words (whole or part of letter is too big or too small)</p> <p>4. Size between words (some words are small and some words are big)</p>                                                                                                  | <p>Malloy-Miller, 1985</p>                                                                                                                             |



|                                                                                                                                                                                                                                                                                             |            |                                                                |                    |                                                                                                                                                                                                                                                                                                                                                                                                                              |                                                                                                                                                                       |
|---------------------------------------------------------------------------------------------------------------------------------------------------------------------------------------------------------------------------------------------------------------------------------------------|------------|----------------------------------------------------------------|--------------------|------------------------------------------------------------------------------------------------------------------------------------------------------------------------------------------------------------------------------------------------------------------------------------------------------------------------------------------------------------------------------------------------------------------------------|-----------------------------------------------------------------------------------------------------------------------------------------------------------------------|
|                                                                                                                                                                                                                                                                                             |            |                                                                |                    | 5. Baseline orientation (letters overshoot or undershoot the baseline)<br>6. Closure (improper closure of letter parts)<br>7. Line quality (curves are angular or straight lines are wavy)                                                                                                                                                                                                                                   |                                                                                                                                                                       |
| The Concise Assessment Scale for Children's Handwriting (BHK; Hamstra-Bletz et al., 1987);<br><br>The revised version: the Dutch tool Systematic Screening of Handwriting (Dutch: 'Systematische Opsporing van Schrijfmotorische Stoornissen', i.e., SOS; Van Waelvelde et al., 2009, 2012) | Grades 2-3 | An ordinal scale from 0 to 5, a high score indicating deviance | Alphabet           | 1. Letter size too large for the child's age<br>2. Left margin widening<br>3. Poor word alignment<br>4. Insufficient word spacing<br>5. Acute turns in connecting letters<br>6. Irregularities in joining letters<br>7. Collision of letters<br>8. Inconsistent letter size<br>9. Incorrect relative height<br>10. Odd letters<br>11. Ambiguous letter forms<br>12. Correction of letter forms<br>13. Unsteady writing trace | Duiser et al., 2014;<br>Hellinckx et al., 2013;<br>Kaiser et al., 2009;<br>Overvelde & Hulstijn, et al., 2011; van Hartingsveldt et al., 2015;<br>Volman et al., 2006 |
| The Tseng Handwriting Problem Checklist (Tseng, 1993)                                                                                                                                                                                                                                       | Grades 4-5 | A 3-point Likert scale (0 = most legible, 2 = least legible)   | Chinese characters | 1. Square configuration (i.e., out of grid)<br>2. Number of strokes (i.e., superfluous/missing strokes)<br>3. Spatial relationship (i.e., incorrect position of components, poor alignment of characters)                                                                                                                                                                                                                    | Linda et al., 2014                                                                                                                                                    |

|                                                                                   |            |                                                                                                                                                                                                                  |                         |                                                                                                                                                                                                            |                    |
|-----------------------------------------------------------------------------------|------------|------------------------------------------------------------------------------------------------------------------------------------------------------------------------------------------------------------------|-------------------------|------------------------------------------------------------------------------------------------------------------------------------------------------------------------------------------------------------|--------------------|
|                                                                                   |            |                                                                                                                                                                                                                  |                         | 4. Spacing and size (i.e., disproportional spacing and size between components of a character)<br>5. Word formation (i.e., malformation of components)                                                     |                    |
| The Evaluation Tool of Children's Handwriting-Manuscript (ETCH-M; Amundson, 1995) | Grades 1-2 | Illegible words/letters/numerals are counted and converted to a word/letter/numeral percentage; total ETCH-M word, letter, numeral legibility scores are obtained and expressed as total legibility percentages. | Alphabet (and numerals) | 1. Letter formation<br>2. Size<br>3. Horizontal alignment<br>4. Spacing<br>5. Letter case<br>6. Speed                                                                                                      | Amundson, 1995     |
| Self-developed handwriting evaluation 1 (Klein et al., 2011)                      | Grades 3-6 | The number of errors made                                                                                                                                                                                        | Alphabet                | 1. Letter formation<br>2. Size<br>3. Spacing<br>4. Alignment<br>5. Slant<br>6. Order<br>7. Reversals<br>8. Omissions<br>9. Insertions<br>10. Tremulous/jerky lines<br>11. Margin widening and/or narrowing | Klein et al., 2011 |

|                                                               |            |                                                                                    |                    |                                                                                                                                                                                  |                     |
|---------------------------------------------------------------|------------|------------------------------------------------------------------------------------|--------------------|----------------------------------------------------------------------------------------------------------------------------------------------------------------------------------|---------------------|
|                                                               |            |                                                                                    |                    | 12. Pressure                                                                                                                                                                     |                     |
| Self-developed handwriting evaluation 2 (Maeland, 1992)       | Grade 4    | A 7-point scale                                                                    | Alphabet           | 1. Accuracy of letter formation<br>2. Uniformity of letter size<br>3. Uniformity of letter slope<br>4. Spacing between letters and words<br>5. Alignment of the lines of writing | Maeland, 1992       |
| Self-developed handwriting evaluation 3 (Tseng, 1994)         | Grades 3-5 | A 7-point scale                                                                    | Chinese characters | Global legibility sorting                                                                                                                                                        | Tseng, 1994         |
| Self-developed handwriting evaluation 4 (Jameel et al., 2017) | Grades 4-5 | A 5-point scale, with 1 to 5 being given to poor and excellent legible handwriting | Alphabet           | 1. Readability<br>2. Margin<br>3. Similarity<br>4. Line<br>5. Space<br>6. Size<br>7. Shape<br>8. Slant<br>9. Roundness<br>10. Alignment<br>11. Recognition                       | Jameel et al., 2017 |

#### References:

- Amundson, S.J. (1995). *Evaluation Tool of Children's Handwriting*. Homer, AK: OT Kids.
- Asselborn, T., Gargot, T., Kidziński, Ł., Johal, W., Cohen, D., Jolly, C., & Dillenbourg, P. (2018). Automated human-level diagnosis of dysgraphia using a consumer tablet. *NPJ digital medicine*, 1(1), 42. <https://doi.org/10.1038/s41746-018-0049-x>

- Barnett, A. L., Prunty, M., & Rosenblum, S. (2018). Development of the Handwriting Legibility Scale (HLS): A preliminary examination of Reliability and Validity. *Research in Developmental Disabilities*, 72, 240-247.
- Barnett, A., Henderson, S., Scheib, B., & Schulz, J. (2007). *Detailed assessment of speed of handwriting*. Oxford: Harcourt Assessment.
- Barnett, A., Rosenblum, S., & Prunty, M. (2013). Development of the Handwriting Legibility Scale (HLS): an examination of reliability and validity. *Nara: International Graphonomics Society*.
- Bo, J., Colbert, A., Lee, C. M., Schaffert, J., Oswald, K., & Neill, R. (2014). Examining the relationship between motor assessments and handwriting consistency in children with and without probable developmental coordination disorder. *Research in Developmental Disabilities*, 35(9), 2035-2043.
- Bumin, G., & Kavak, S. T. (2010). An investigation of the factors affecting handwriting skill in children with hemiplegic cerebral palsy. *Disability and Rehabilitation*, 32(8), 692-703.
- Chang, S. H., & Yu, N. Y. (2012). *Chinese Handwriting Evaluation Form: Manual*. Taipei, Taiwan: Psychological Publishing.
- Chang, S. H., & Yu, N. Y. (2005). Evaluation and classification of types of Chinese handwriting deficits in elementary schoolchildren. *Perceptual and Motor Skills*, 101(2), 631-647.
- Cheng-Lai, A., Li-Tsang, C. W., Chan, A. H., & Lo, A. G. (2013). Writing to dictation and handwriting performance among Chinese children with dyslexia: Relationships with orthographic knowledge and perceptual-motor skills. *Research in Developmental Disabilities*, 34(10), 3372-3383.
- Daly, C. J., Kelley, G. T., & Krauss, A. (2003). Relationship between visual-motor integration and handwriting skills of children in kindergarten: A modified replication study. *American Journal of Occupational Therapy*, 57(4), 459-462.
- Desai, A. S., & Rege, P. V. (2005). Correlation between developmental test of visual-motor integration [VMI] and handwriting in cerebral palsy children. *The Indian Journal of Occupational Therapy*, 37(2), 27-31.
- Duiser, I. H., van der Kamp, J., Ledebt, A., & Savelsbergh, G. J. (2014). Relationship between the quality of children's handwriting and the Beery-Buktenica developmental test of visuomotor integration after one year of writing tuition. *Australian Occupational Therapy Journal*, 61(2), 76-82.
- Erez, N., Yochman, A., & Parush, S. (1996). *The Hebrew Handwriting Evaluation*. Jerusalem: The Hebrew University of Jerusalem.
- Farhangnia, S., Hassanzadeh, R., & Ghorbani, S. (2020). Handwriting performance of children with attention deficit hyperactivity disorder: The role of visual-motor integration. *International Journal of Pediatrics*, 8(11), 12317-12326.

- Gargot, T., Asselborn, T., Pellerin, H., Zammouri, I., M. Anzalone, S., Casteran, L., ... & Jolly, C. (2020). Acquisition of handwriting in children with and without dysgraphia: A computational approach. *PLoS One*, 15(9), e0237575.
- Gilboa, Y., Josman, N., Fattal-Valevski, A., Toledano-Alhadeh, H., & Rosenblum, S. (2014). Underlying mechanisms of writing difficulties among children with neurofibromatosis type 1. *Research in Developmental Disabilities*, 35(6), 1310-1316.\*
- Gilboa, Y., Josman, N., Fattal-Valevski, A., Toledano-Alhadeh, H., & Rosenblum, S. (2010). The handwriting performance of children with NF1. *Research in Developmental Disabilities*, 31, 929-935.
- Hamstra-Bletz, L., De Bie, J., & Den Brinker, B. P. L. M. (1987). Beknopte beoordelingsmethode voor kinderhandschriften: Experimentele versie [Concise evaluation-scale for children's handwriting: Experimental version]. Lisse: Swets&Zeitlinger.
- Havaei, N., Azad, A., ALIZADE, Z. M., & Ebadi, A. (2017). Development and validity of the Persian Handwriting Assessment Tool for primary school-aged children. *Crescent Medical Journal*, 19(3), 1-9.
- Hellinckx, T., Roeyers, H., & Van Waelvelde, H. (2013). Predictors of handwriting in children with autism spectrum disorder. *Research in Autism Spectrum Disorders*, 7(1), 176-186.
- Jameel, H. T., & Nabeel, T. (2017). Effect of visual motor integration training on legibility of urdu handwriting. *Pakistan Journal of Education*, 34(1).
- Jameel, H. T., & Nabeel, T. (2017). Effect of visual motor integration training on legibility of urdu handwriting. *Pakistan Journal of Education*, 34(1).
- Kaiser, M. L., Albaret, J. M., & Doudin, P. A. (2009). Relationship between visual-motor integration, eye-hand coordination, and quality of handwriting. *Journal of Occupational Therapy, Schools, & Early Intervention*, 2(2), 87-95.
- Klein, S., Guiltner, V., Sollereder, P., & Cui, Y. (2011). Relationships between fine-motor, visual-motor, and visual perception scores and handwriting legibility and speed. *Physical & Occupational Therapy in Pediatrics*, 31(1), 103-114.
- Lam, S. S., Au, R. K., Leung, H. W., & Li-Tsang, C. W. (2011). Chinese handwriting performance of primary school children with dyslexia. *Research in developmental disabilities*, 32(5), 1745-1756.
- Lee, T. I., Howe, T. H., Chen, H. L., & Wang, T. N. (2016). Predicting handwriting legibility in Taiwanese elementary school children. *American Journal of Occupational Therapy*, 70(6), 1-9.
- Linda, F. L., Thanapalan, K. C., & Chan, C. C. (2014). Visual-perceptual-kinesthetic inputs on influencing writing performances in children with handwriting difficulties. *Research in developmental disabilities*, 35(2), 340-347.

- Li-Tsang, C. W., Au, R. K., Chan, M. H., Chan, L. W., Lau, G. M., Lo, T. K., & Leung, H. W. (2011). Handwriting characteristics among secondary students with and without physical disabilities: A study with a computerized tool. *Research in Developmental Disabilities*, 32(1), 207-216.
- Li-Tsang, C. W., Li, T. M., Yang, C. N., Leung, H. W., & Zhang, E. W. (2022). Evaluating Chinese handwriting performance of primary school students using the Smart Handwriting Analysis and Recognition Platform (SHARP). *medRxiv*.
- Li-Tsang, C. W., Wong, A. S., Leung, H. W., Cheng, J. S., Chiu, B. H., Linda, F. L., & Chung, R. C. (2013). Validation of the Chinese Handwriting Analysis System (CHAS) for primary school students in Hong Kong. *Research in Developmental Disabilities*, 34(9), 2872-2883.
- Maeland, A. F. (1992). Handwriting and perceptual-motor skills in clumsy, dysgraphic, and 'normal' children. *Perceptual and Motor Skills*, 75(3\_suppl), 1207-1217.
- Malloy-Miller, T. (1985). *An Examination of handwriting problem subtypes*, Unpublished Master's Thesis, University of Calgary, Calgary, Alberta.
- Mekyska, J., Faundez-Zanuy, M., Mzourek, Z., Galaz, Z., Smekal, Z., & Rosenblum, S. (2016). Identification and rating of developmental dysgraphia by handwriting analysis. *IEEE Transactions on Human-Machine Systems*, 47(2), 235-248.
- Overvelde, A., & Hulstijn, W. (2011). Handwriting development in grade 2 and grade 3 primary school children with normal, at risk, or dysgraphic characteristics. *Research in Developmental Disabilities*, 32(2), 540-548.
- Pagliarini, E., Scocchia, L., Vernice, M., Zoppello, M., Balottin, U., Bouamama, S., ... & Stucchi, N. (2017). Children's first handwriting productions show a rhythmic structure. *Scientific reports*, 7(1), 5516.
- Parush, S., Lifshitz, N., Yochman, A., & Weintraub, N. (2010). Relationships between handwriting components and underlying perceptual-motor functions among students during copying and dictation tasks. *OTJR: Occupation, Participation and Health*, 30(1), 39-48.
- Preminger, F., Weiss, P. L., & Weintraub, N. (2004). Predicting occupational performance: Handwriting versus keyboarding. *The American Journal of Occupational Therapy*, 58(2), 193-201.
- Prunty, M., Barnett, A. L., Wilmut, K., & Plumb, M. (2016). Visual perceptual and handwriting skills in children with Developmental Coordination Disorder. *Human Movement Science*, 49, 54-65.
- Reisman, J. (2004). Minnesota Handwriting Assessment. San Antonio, TX: Psychological Corporation Retrieved from <http://www.pearsonclinical.com/therapy/products/100000275/minnesota-handwriting-assessment.html>.
- Rosenblum, S. (2008). Development, reliability, and validity of the Handwriting Proficiency Screening Questionnaire (HPSQ). *The American Journal of Occupational Therapy*, 62(3), 298-307.

- Rosenblum, S. (2008). Development, reliability, and validity of the Handwriting Proficiency Screening Questionnaire (HPSQ). *The American Journal of Occupational Therapy*, 62(3), 298-307.
- Rosenblum, S., Parush, S., & Weiss, P. L. (2003). Computerized temporal handwriting characteristics of proficient and non-proficient handwriters. *American Journal of Occupational Therapy*, 57, 129-138.
- Seyyedrezaei, S. H., Khajeaflaton, S., Ghorbani, S., & Dana, A. (2021). Relative age effects on children's handwriting: Role of visual-motor integration. *International Journal of Pediatrics*, 9(1), 12775-12783.
- Shen, I. H., Lee, T. Y., & Chen, C. L. (2012). Handwriting performance and underlying factors in children with attention deficit hyperactivity disorder. *Research in Developmental Disabilities*, 33(4), 1301-1309.
- Shih, H. N., Tsai, W. H., Chang, S. H., Lin, C. Y., Hong, R. B., & Hwang, Y. S. (2018). Chinese handwriting performance in preterm children in grade 2. *PloS One*, 13(6), e0199355.
- Taverna, L., Tremolada, M., Tosetto, B., Dozza, L., & Renata, Z. S. (2020). Impact of psycho-educational activities on visual-motor integration, fine motor skills and name writing among first graders: a kinematic pilot study. *Children*, 7(4), 27.
- Tseng, M. H. (1993). Factorial validity of the Tseng Handwriting Problem Checklist. *Journal of Occupational Therapy Association*, 11, 13-27.
- Tseng, M. H., & Murray, E. A. (1994). Differences in perceptual-motor measures in children with good and poor handwriting. *The Occupational Therapy Journal of Research*, 14(1), 19-36.
- Van Hartingsveldt, M. J., Cup, E. H., Hendriks, J. C., de Vries, L., de Groot, I. J., & Nijhuis-van der Sanden, M. W. (2015). Predictive validity of kindergarten assessments on handwriting readiness. *Research in Developmental Disabilities*, 36, 114-124.
- Van Waelvelde, H., De Mey, B., & Smits-Engelsman, B. C. M. (2009). Systematische Opsporing van Schrijfmotorische stoornissen (SOS).
- Van Waelvelde, H., Hellinckx, T., Peersman, W., & Smits-Engelsman, B. C. M. (2012). SOS: A screening instrument to identify children with handwriting impairments. *Physical & Occupational Therapy in Pediatrics*, 32(3), 306-319.
- Volman, M. J. M., van Schendel, B. M., & Jongmans, M. J. (2006). Handwriting difficulties in primary school children: A search for underlying mechanisms. *American Journal of Occupational Therapy*, 60(4), 451-460.
- Weil, M. J., & Cunningham Amundson, S. J. (1994). Relationship between visuomotor and handwriting skills of children in kindergarten. *The American Journal of Occupational Therapy*, 48(11), 982-988.
- Wicki, W., Lichtsteiner, S. H., Geiger, A. S., & Müller, M. (2014). Handwriting fluency in children. *Swiss Journal of Psychology*, 73(2), 87-96.

Yochman, A., & Parush, S. (1998). Differences in Hebrew handwriting skills between Israeli children in second and third grade. *Physical & Occupational Therapy in Pediatrics, 18*(3-4), 53-65.
